# Supplementary material for: The Interaction between Circulating Cell-Free Mitochondrial DNA and Inflammatory Cytokines in Predicting Human Mental Health Issue Risk in Adolescents: An Explorative Study
Source: MDPI journal article supplement (doi:10.3390/biomedicines11030818), 2023-03-07
Supplement: s1 [file s1]

**Table S1. Information of Taqman Gene Expression assays**

| <b>Gene</b>   | <b>Assay ID</b> | <b>Context Sequences (5'→3')</b> | <b>Amplicon length</b> |
|---------------|-----------------|----------------------------------|------------------------|
| <i>mt-ND4</i> | Hs02596876_g1   | AACTCCTGAGCCAACAACCTTAATAT       | 150 nt                 |
| <i>mt-CO1</i> | Hs02596864_g1   | GTCCTAGCTGCTGGCATCACTATAC        | 94 nt                  |
