# Supplementary material for: The Interaction between Circulating Cell-Free Mitochondrial DNA and Inflammatory Cytokines in Predicting Human Mental Health Issue Risk in Adolescents: An Explorative Study
Source: MDPI journal article supplement (doi:10.3390/biomedicines11030818), 2023-03-07

**Figure S1. Sequence Analysis of the copy number plasmids**

5'EcoRI highlighted in Yellow  
3'EcoRI highlighted in Cyan

**MT-ND4:** A 69 T 61 C 76 G 27 | GC%: 44.21% | Length: 233

GAATTC TAGGCTCCCTTCCCCTACTCATCGCACTAATTTACACTCACAACACCCTAGGCTCACTAAACATTCTACTACTCACTCTCACTGCCAA  
ACTATCAAACCTCTGAGCCAACAACCTTAATATGACTAGCTTACACAATAGCTTTTATAGTAAAGATACCTCTTTACGGACTCCACTTATGACTCC  
AAAGCCCATGTCTGAAGCCCCCATCGCTGGGTCA GAATTC

**GC Content**

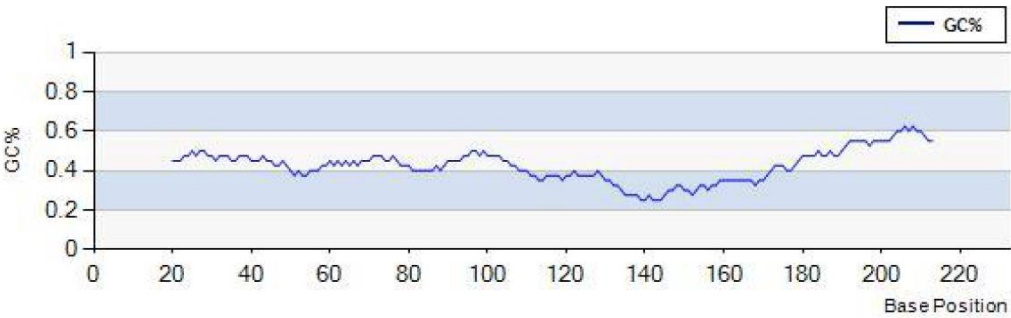

**MT-CO1:** A 44 T 41 C 68 G 24 | GC%: 51.98% | Length: 177

GAATTC CCAATACCAAACGCCCTCTTCGTCTGATCCGTCCTAATCACAGCAGTCCTACTTCTCCTATCTCTCCAGTCCTAGCTGCTGGCATCA  
ATACTACTAACAGACCGCAACCTCAACACCACCTTCTTCGACCCCGCCGAGGAGGAGACCCATTCTATACCA GAATTC

**GC Content**

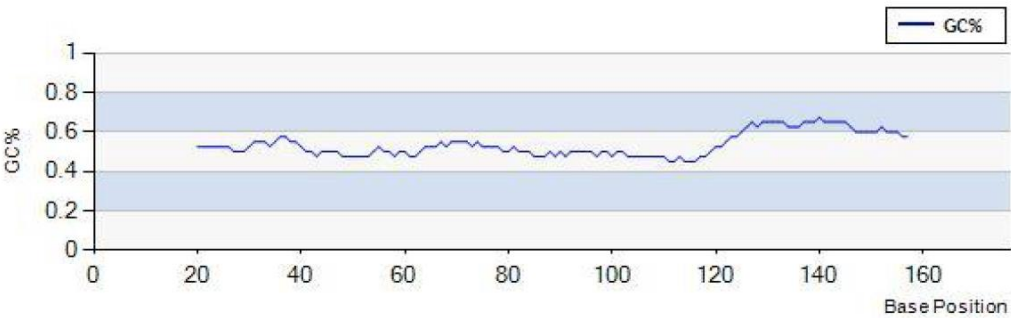

Supplement: s1 [file s1]
